# Supplementary material for: Transcriptional plasticity buffers genetic variation in zinc homeostasis
Source: PubMed Central journal article supplement (PMC6925235; doi:10.1038/s41598-019-55736-0), 2019-12-20
Supplement: 41598_2019_55736_MOESM1_ESM.pdf [file 41598_2019_55736_MOESM1_ESM.pdf]

## Transcriptional plasticity buffers genetic variation in zinc homeostasis

Alice Pita-Barbosa<sup>1,3</sup>, Felipe K. Ricachenevsky<sup>2</sup>, Michael Wilson<sup>3</sup>, Tania Dottorini<sup>4</sup> and David E. Salt<sup>3\*</sup>

**Table S1.** Ionomics profile of *Arabidopsis thaliana* Col-0 and Col-0::HMA3<sup>CSHL-5</sup> lines (one-way ANOVA,  $P \leq 0.05$ )

| Element | ANOVA | Sum of Squares | df | Mean Square | F       | Sig.    |
|---------|-------|----------------|----|-------------|---------|---------|
| As      | BG    | 0.00951539     | 3  | 0.0031718   | 0.6564  | 0.5914  |
|         | WG    | 0.072481       | 15 | 0.00483207  |         |         |
|         | Total | 0.0819964      | 18 | 0.5882      |         |         |
| B       | BG    | 0.0198491      | 3  | 0.00661637  | 0.1925  | 0.8999  |
|         | WG    | 0.515583       | 15 | 0.0343722   |         |         |
|         | Total | 0.535432       | 18 | 0.8995      |         |         |
| Ca      | BG    | 0.00543574     | 3  | 0.00181191  | 0.3318  | 0.8025  |
|         | WG    | 0.0819034      | 15 | 0.00546023  |         |         |
|         | Total | 0.0873392      | 18 | 0.8055      |         |         |
| Co      | BG    | 0.0137991      | 3  | 0.00459969  | 1.439   | 0.2735  |
|         | WG    | 0.044744       | 14 | 0.003196    |         |         |
|         | Total | 0.0585431      | 17 | 0.2717      |         |         |
| Cu      | BG    | 0.0292428      | 3  | 0.00974761  | 2.046   | 0.1537  |
|         | WG    | 0.0667121      | 14 | 0.00476515  |         |         |
|         | Total | 0.0959549      | 17 | 0.1533      |         |         |
| Fe      | BG    | 0.0711234      | 3  | 0.0237078   | 1.557   | 0.2553  |
|         | WG    | 0.167527       | 11 | 0.0152297   |         |         |
|         | Total | 0.23865        | 14 | 0.1827      |         |         |
| K       | BG    | 0.0179175      | 3  | 0.00597249  | 1.559   | 0.2407  |
|         | WG    | 0.0574652      | 15 | 0.00383101  |         |         |
|         | Total | 0.0753826      | 18 | 0.2381      |         |         |
| Li      | BG    | 0.00419364     | 3  | 0.00139788  | 0.06185 | 0.9791  |
|         | WG    | 0.339018       | 15 | 0.0226012   |         |         |
|         | Total | 0.343212       | 18 | 0.9805      |         |         |
| Mg      | BG    | 0.00146501     | 3  | 0.000488336 | 0.1428  | 0.9327  |
|         | WG    | 0.051281       | 15 | 0.00341873  |         |         |
|         | Total | 0.052746       | 18 | 0.9312      |         |         |
| Mn      | BG    | 0.00911051     | 3  | 0.00303684  | 1.148   | 0.3621  |
|         | WG    | 0.0396936      | 15 | 0.00264624  |         |         |
|         | Total | 0.0488041      | 18 | 0.3624      |         |         |
| Mo      | BG    | 0.033977       | 3  | 0.0113257   | 2.924   | 0.07071 |
|         | WG    | 0.0542227      | 14 | 0.00387305  |         |         |
|         | Total | 0.0881997      | 17 | 0.07173     |         |         |
| Na      | BG    | 0.279709       | 3  | 0.0932364   | 3.057   | 0.07359 |
|         | WG    | 0.335455       | 11 | 0.0304959   |         |         |
|         | Total | 0.615164       | 14 | 0.07848     |         |         |
| Ni      | BG    | 0.0111789      | 3  | 0.00372631  | 0.4315  | 0.7335  |
|         | WG    | 0.129535       | 15 | 0.00863566  |         |         |
|         | Total | 0.140714       | 18 | 0.7766      |         |         |
| P       | BG    | 0.0107989      | 3  | 0.00359964  | 0.9971  | 0.4211  |
|         | WG    | 0.0541539      | 15 | 0.00361026  |         |         |
|         | Total | 0.0649528      | 18 | 0.4202      |         |         |
| Rb      | BG    | 0.0170098      | 3  | 0.00566994  | 1.018   | 0.4122  |
|         | WG    | 0.0835124      | 15 | 0.0055675   |         |         |
|         | Total | 0.100522       | 18 | 0.4115      |         |         |
| S       | BG    | 0.00877547     | 3  | 0.00292516  | 1.223   | 0.3358  |
|         | WG    | 0.0358841      | 15 | 0.00239228  |         |         |
|         | Total | 0.0446596      | 18 | 0.332       |         |         |
| Se      | BG    | 0.00517408     | 3  | 0.00172469  | 0.3758  | 0.7718  |

|    |       |           |    |            |       |        |
|----|-------|-----------|----|------------|-------|--------|
|    | WG    | 0.0688477 | 15 | 0.00458985 |       |        |
|    | Total | 0.0740218 | 18 | 0.7717     |       |        |
| Sr | BG    | 0.0119539 | 3  | 0.00398462 | 1.529 | 0.2477 |
|    | WG    | 0.0390778 | 15 | 0.00260518 |       |        |
|    | Total | 0.0510316 | 18 | 0.2426     |       |        |

BG: between groups; WG: within groups; Sig.: significance.

**Table S2.** Primers used for gene expression analysis by qRT-PCR

| <i>Gene</i>                                   | <i>Locus</i> | <i>Primer pairs (5' → 3')*</i>                              |
|-----------------------------------------------|--------------|-------------------------------------------------------------|
| <i>bZIP19</i> (Transcription Factor bZIP19)   | AT4G35040    | (+)CGTGCTTCATGTCCACACC<br>(-)CCCGGTTTCCCAAAGGTCTC           |
| <i>EF1-a4</i> (Elongation Factor 1-alpha 4)** | AT5G60390    | (+)CACATTTTCGTAGCCGCAAGACTCC<br>(-)GATGACACGCTTGTCAATACCACC |
| <i>HMA3</i> (Heavy Metal ATPase3)             | AT4G30120    | (+)TGCTGCTCATAAGGCAAGCA<br>(-)CTAGTCCAGTATCCGCGATCACT       |
| <i>HMA4</i> (Heavy Metal ATPase4)             | AT2G19110    | (+)GCTCAAGAACAGCTAGGGAATG<br>(-)CATTGCGGTTGGTCCCTCTT        |
| <i>MTP1</i> (Metal Tolerance Protein 1)       | AT2G46800    | (+)CTCCCTGCGGATGTAATCCATT<br>(-)GAGATTGACGCCACAAAGCTC       |
| <i>MTP3</i> (Metal Tolerance Protein A2)      | AT3G58810    | (+)TTTGCCTTCCATCCCGAA<br>(-)CTGATGTTGCAGCCTTTGCA            |
| <i>NASI</i> (Nicotianamine Synthase 1)        | AT5G04950    | (+)CATGATCTTCCACACAACGAGAC<br>(-)CGACGTCATATTGGTCAAGGC      |
| <i>PCR2</i> (Plant Cadmium resistance 2)      | AT1G14870    | (+)ACAAAACCTTACATTGCTTTCCATT<br>(-)TCCTTCAGCATGAGGCTTGG     |
| <i>PEX4</i> (Peroxin 4)**                     | AT5G25760    | (+)CTGCGACTCAGGGAATCTTCTAA<br>(-)TTGTGCCATTGAATTGAACCC      |
| <i>YSL2</i> (Yellow Stripe Like 2)            | AT5G24380    | (+)CTTATCCTAGTGGAACGGCAAC<br>(-)TCTGTTTCTTGGCTGTCTTATCTCC   |
| <i>ZIF1</i> (Zinc Induced Facilitator 1)      | AT5G13740    | (+)TTGCTATCTCAGGTCTCGGC<br>(-)GTATCATCAGTGCCCCAGCA          |
| <i>ZIP1</i> (Zinc Transporter 1)              | AT3G12750    | (+)AGGAAAGAGAGCAAAGAGGCAA<br>(-)TCCCAGCAGATGCAGCATT         |
| <i>ZIP3</i> (Zinc Transporter 3)              | AT2G32270    | (+)AAAGCGTCTAAGAGGGTTCAG<br>(-)TATTCCCAACTCCAATACCTGTG      |
| <i>ZIP4</i> (Zinc Transporter 4)              | AT1G10970    | (+)TTCTCAGATATTGGAGCTCGG<br>(-)ATGGAGACTGTGATACCCCC         |
| <i>ZIP5</i> (Zinc Transporter 5)              | AT1G05300    | (+)TCCTCGCAACGGGGTTTATG<br>(-)CCTGTGAACGGAAACTCCCA          |

\* (+) and (-) indicate forward and reverse primers, respectively.

\*\* Genes used as endogenous control.
